# Supplementary material for: Seed-specific expression of porcine verotoxigenic Escherichia coli antigens in tobacco plants as a potential model of edible vaccines
Source: Springer Nature journal article supplement (doi:10.1007/s11259-024-10318-y), 2024-02-06
Supplement: MOESM1 [file 11259_2024_10318_MOESM1_ESM.pdf]

## Supplementary Materials

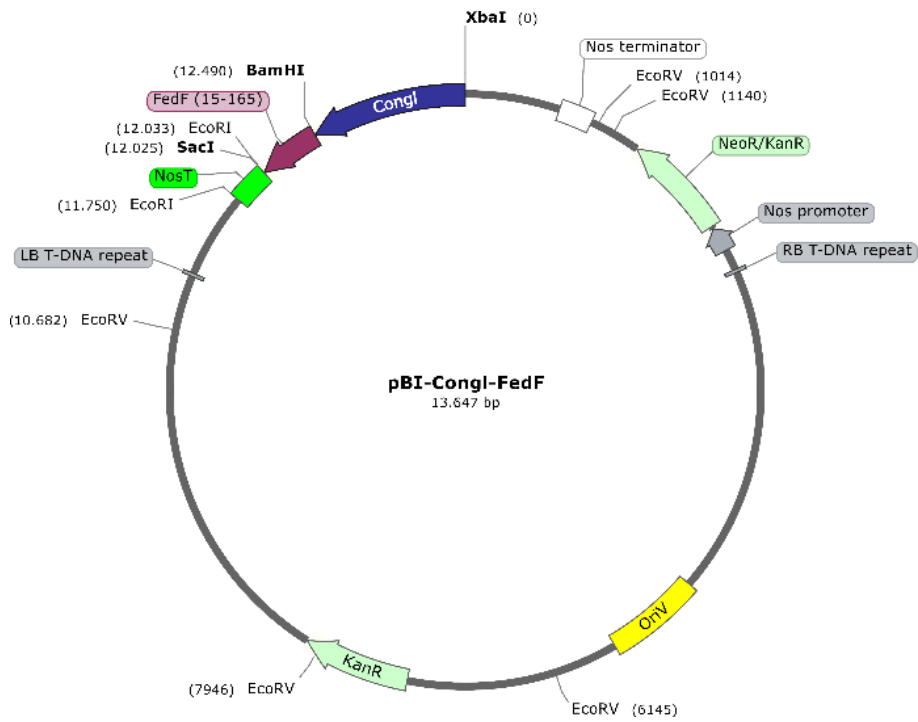

**Supplementary Figure 1.** Binary vector pBI-CongI-FedF used for tobacco transformation.

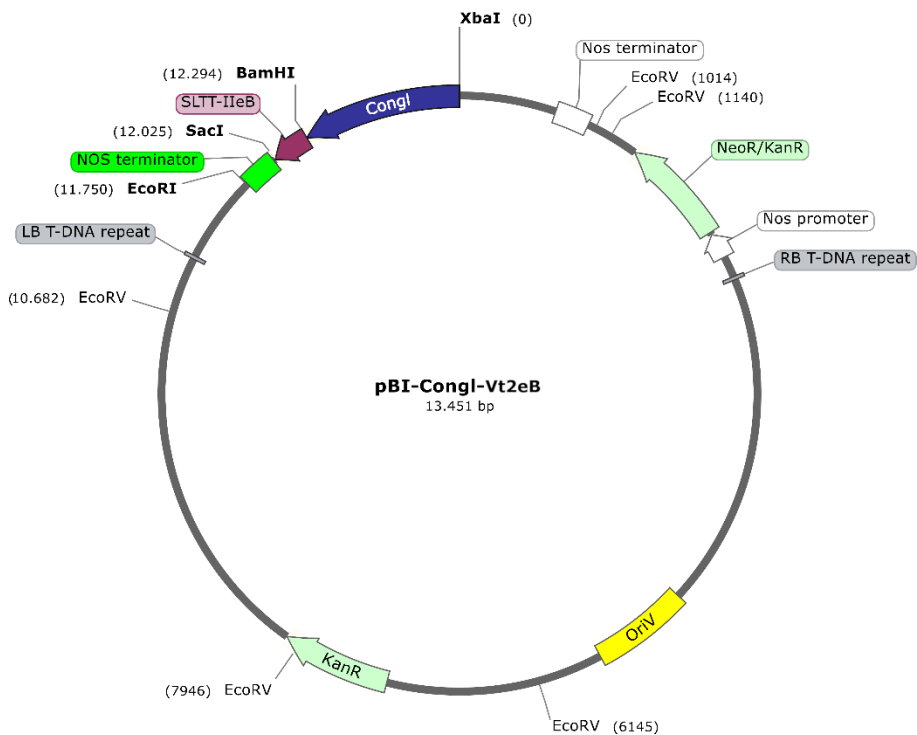

**Supplementary Figure 2.** Binary vector pBI-CongI-Vt2eB used for tobacco transformation.
